# Supplementary material
Source: MDPI journal article supplement (https://www.mdpi.com/2079-6412/12/6/779)
Supplement: s1 [file s1 › coatings-1741869 supplementary.pdf]

# Supplementary Materials: PPy-Modified Prussian Blue Cathode Materials for Low-Cost and Cycling-Stable Aqueous Zinc-Based Hybrid Battery

Yushan Ruan <sup>1</sup>, Lineng Chen <sup>1,\*</sup>, Lianmeng Cui <sup>1</sup> and Qinyou An <sup>1,2,\*</sup>

<sup>1</sup> State Key Laboratory of Advanced Technology for Materials Synthesis and Processing, International School of Materials Science and Engineering, Wuhan University of Technology, Wuhan 430070, China; asura2015@whut.edu.cn (Y.R.); cuilianmeng0530@whut.edu.cn (L.C.)

<sup>2</sup> Foshan Xianhu Laboratory of the Advanced Energy Science and Technology Guangdong Laboratory, Xianhu Hydrogen Valley, Foshan 528200, China

\* Correspondence: clnsmiles@whut.edu.cn (L.C.); anqinyou86@whut.edu.cn (Q.A.)

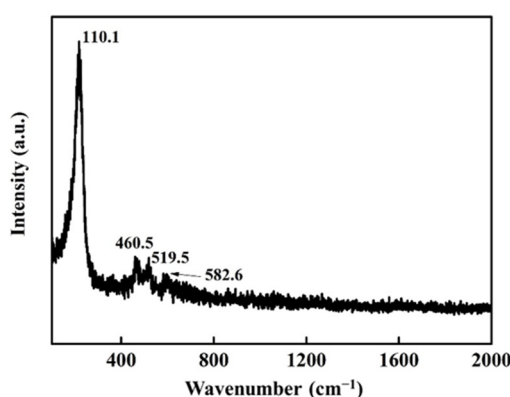

Figure S1. Raman spectrums of NMHFC@PPy.

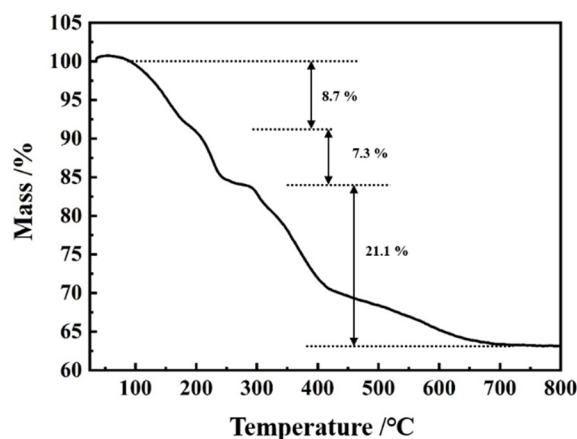

Figure S2. TG curve of NMHFC@PPy.

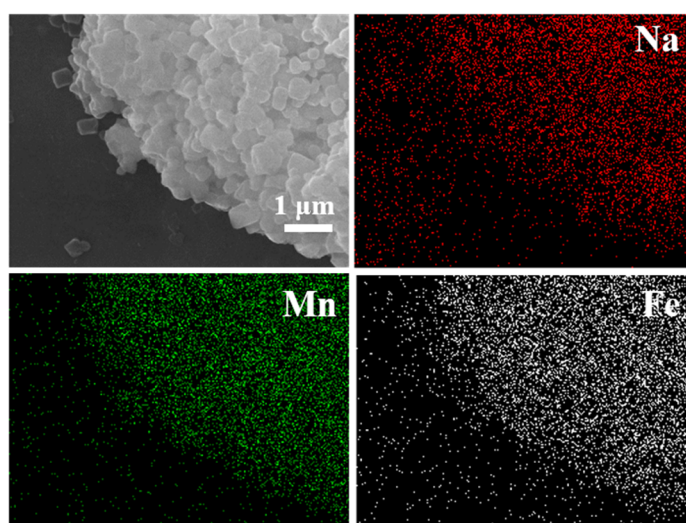

**Figure S3.** EDS-mapping elemental analysis of NMHFC.

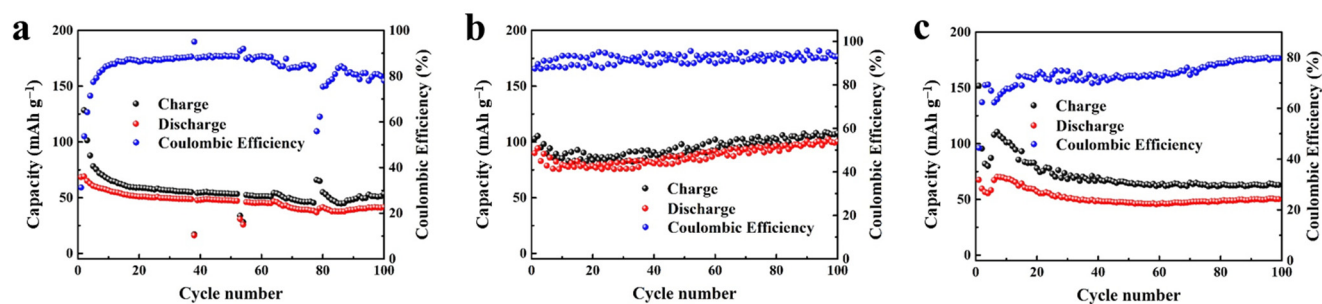

**Figure S4.** Cycling performance curves of NMHFC@PPy in (a) Li-Zn, (b) Na-Zn and (c) K-Zn mixed ionic electrolytes at current density of  $50 \text{ mA g}^{-1}$ , respectively.

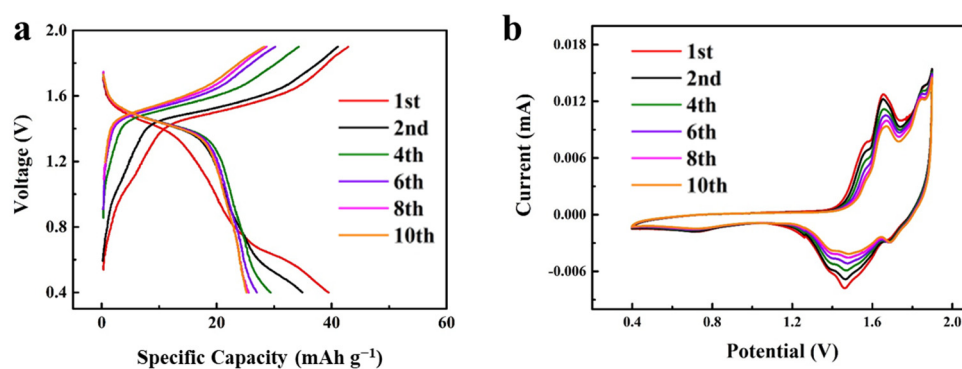

**Figure S5.** (a) charge and discharge curves of NMHFC from 1st to 10th cycles at a current density of  $200 \text{ mA g}^{-1}$ , (b) CV curves of NMHFC at a scan rate of  $0.1 \text{ mV s}^{-1}$ .

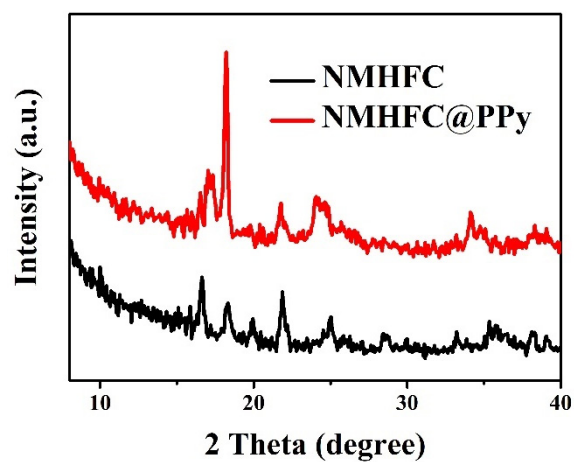

Figure S6. XRD patterns of NMHFC@PPy and NMHFC electrode material after 100 cycles.

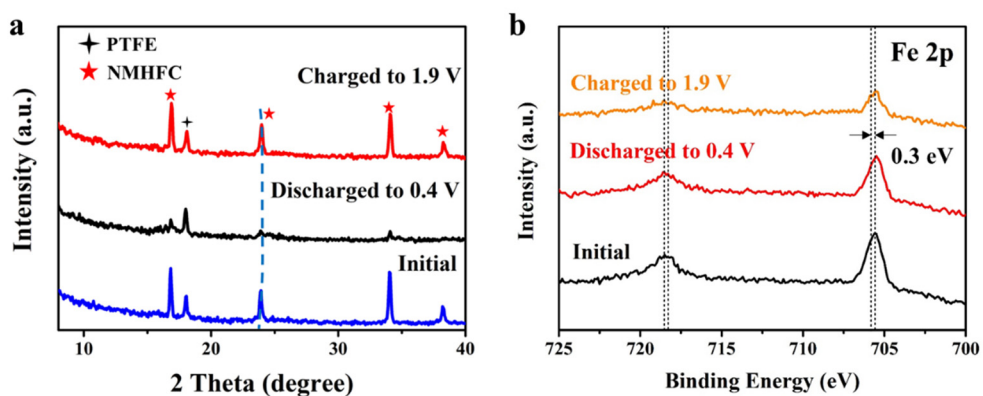

Figure S7. (a) Ex-situ XRD and (b) ex-situ Fe 2p XPS patterns of NMHFC cathode material during the first cycle in different states.

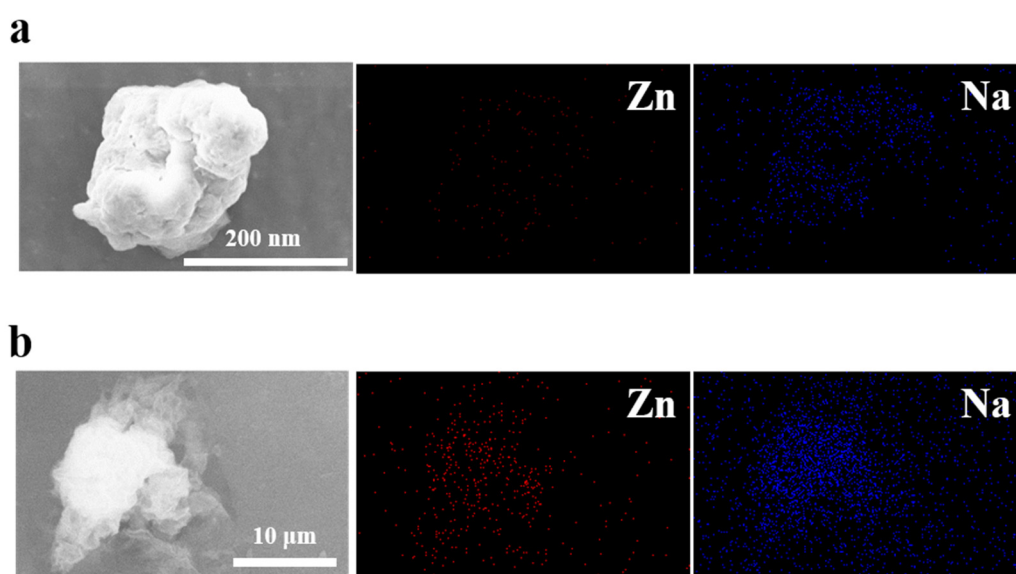

Figure S8. SEM and EDS-mapping analyses of NMHFC@PPy electrode material (a) before discharge and (b) after discharge to 0.4 V.

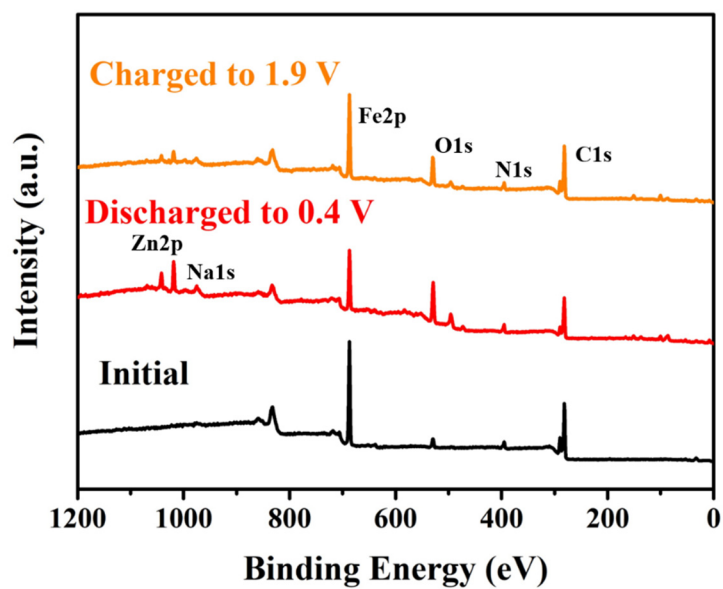

Figure S9. XPS spectra of NMHFC@PPy in different states.

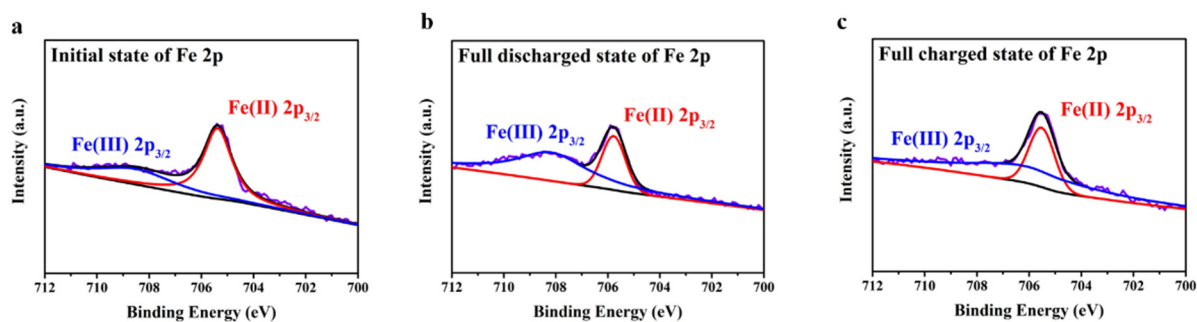

Figure S10. Fe 2p XPS spectra of NMHFC@PPy in different states.
